# Supplementary material
Source: bioRxiv or medRxiv preprint supplement (https://medrxiv.org/highwire/filestream/83428/field_highwire_adjunct_files/5/2020.05.26.20113902-6.pdf)

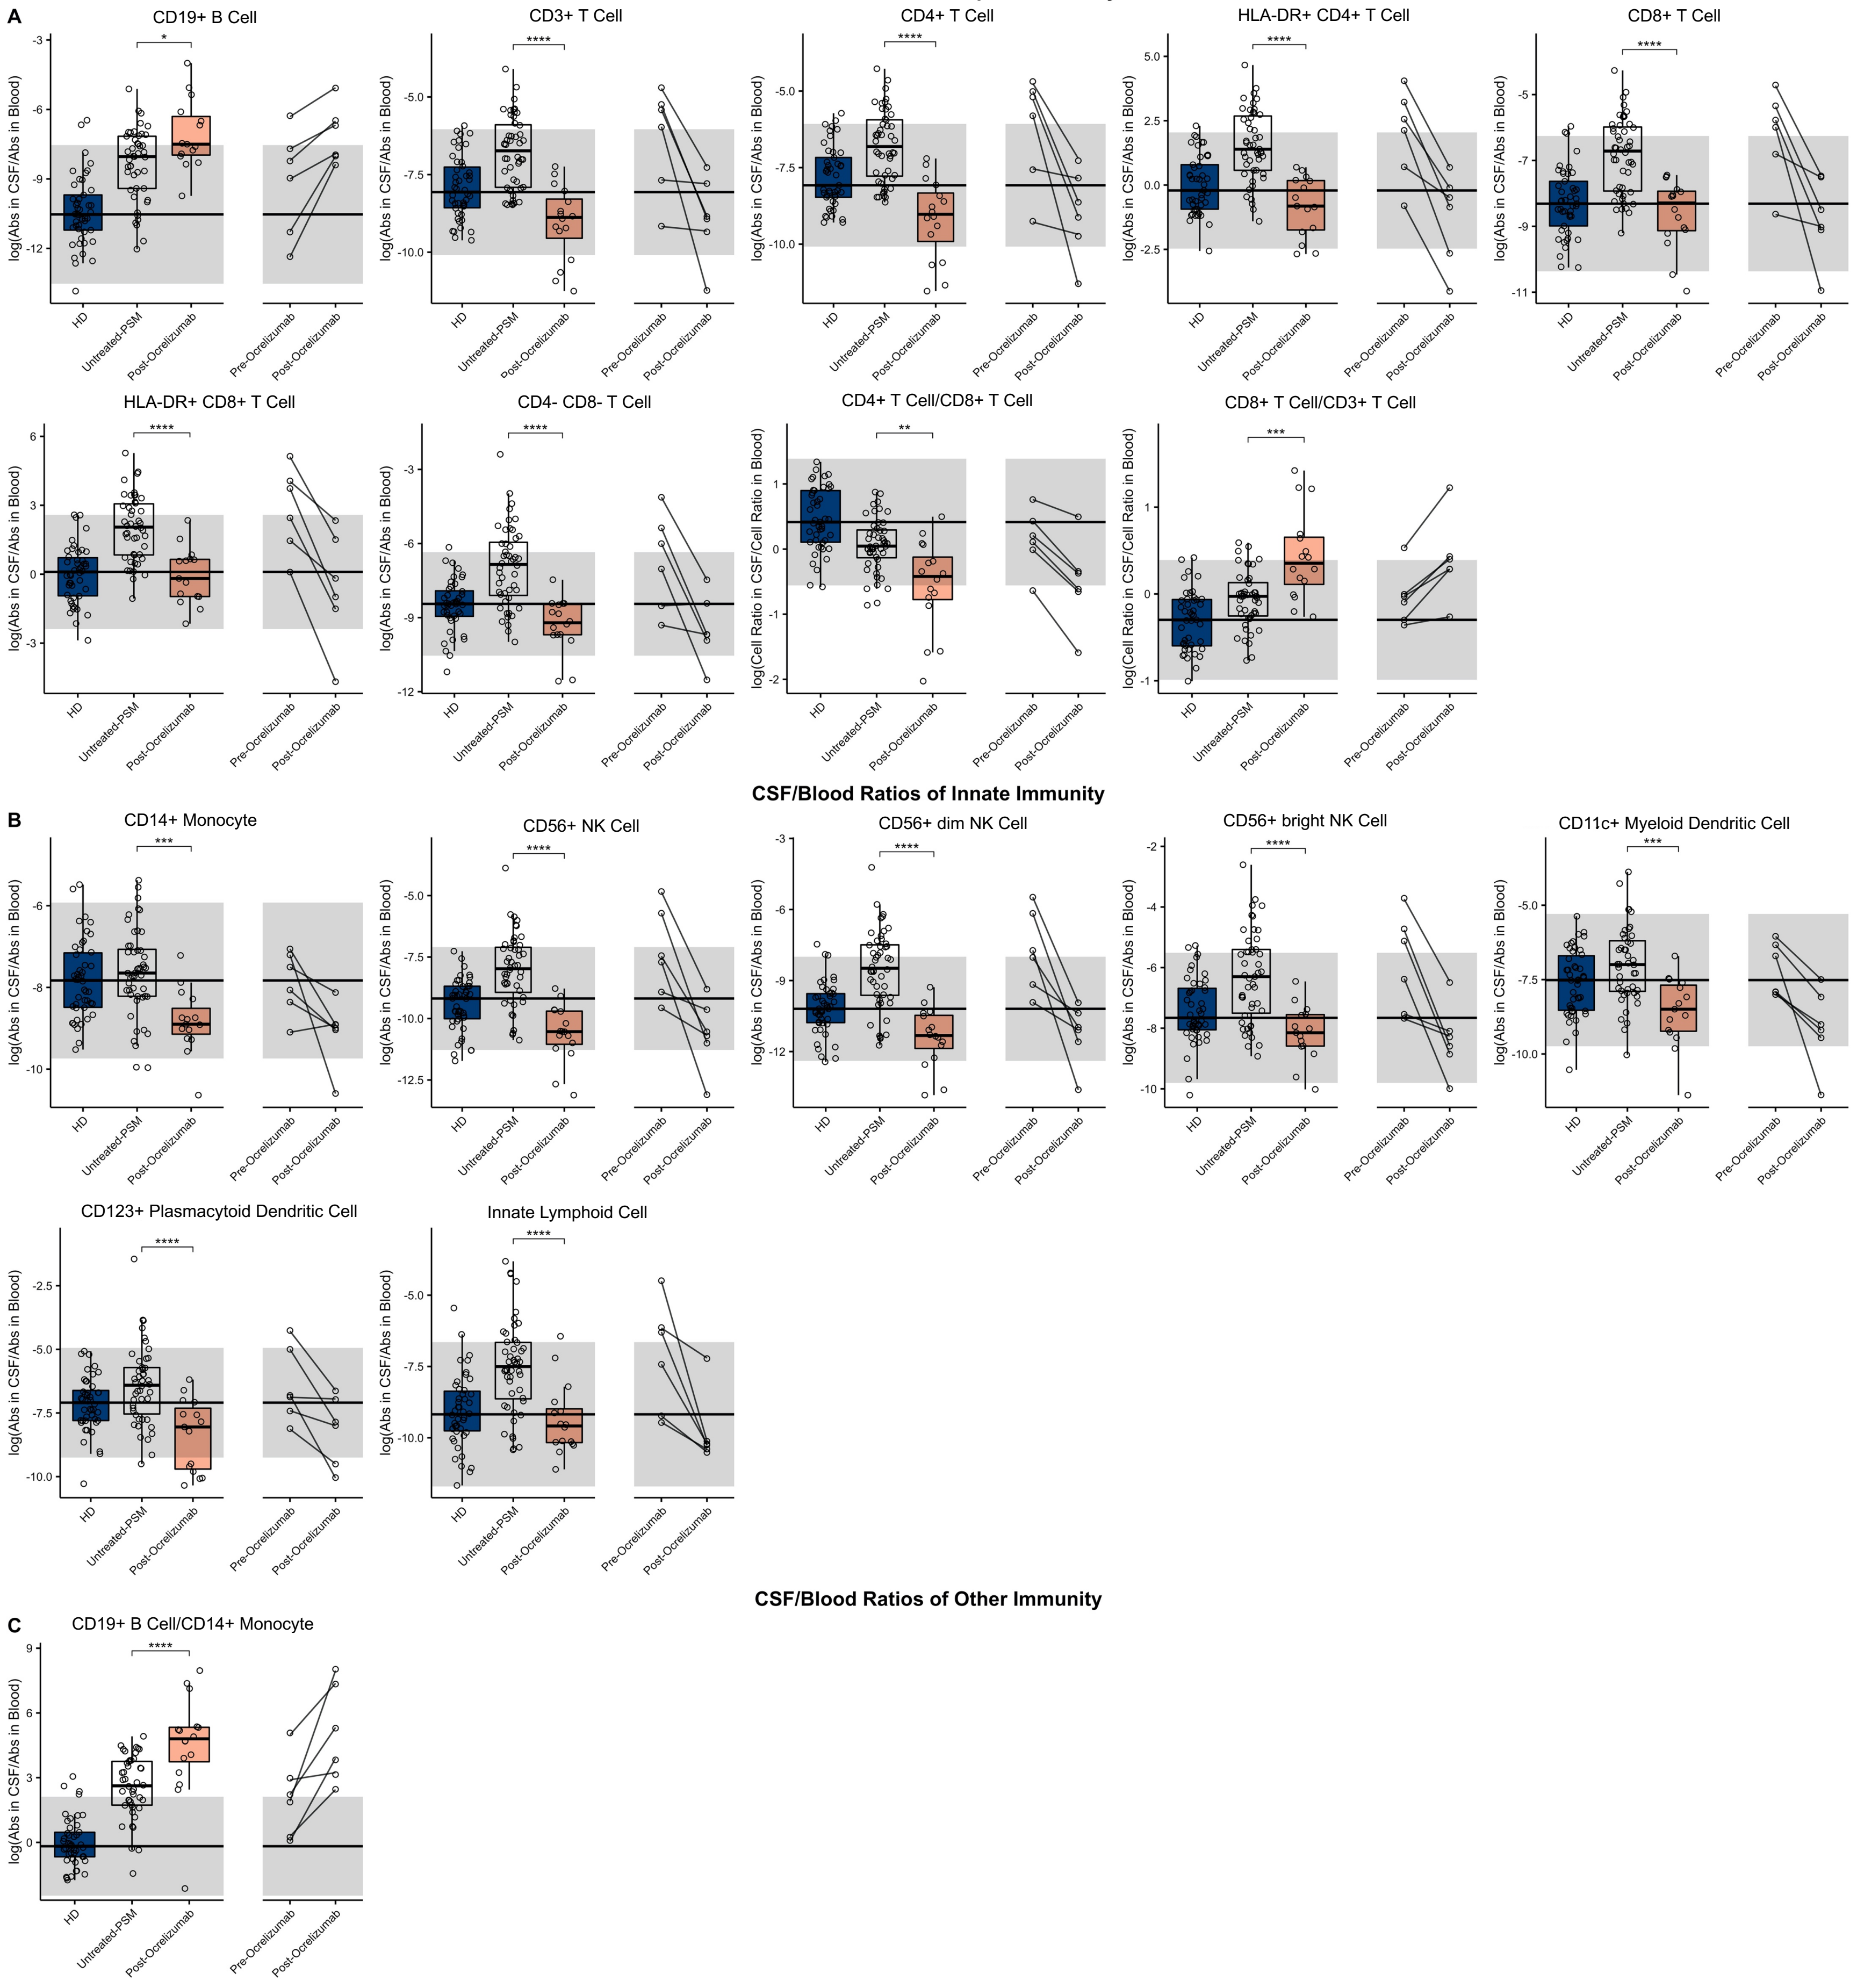

Supplement: Supplementary file [file 2020.05.26.20113902-6.pdf]
